# Supplementary material for: Real-time forecasting the trajectory of monkeypox outbreaks at the national and global levels, July – October 2022
Source: bioRxiv or medRxiv preprint supplement (doi:10.1101/2022.11.02.22281844), 2022-12-29
Supplement: Supplementary file [file media-2.pdf]

**Additional file 2: Supplementary tables**

| <b>Week</b> | <b>Model</b>           | <b>Brazil</b>  | <b>Canada</b> | <b>England</b> | <b>France</b> | <b>Germany</b> | <b>Spain</b>  | <b>US (OWID)</b> | <b>US (CDC)</b> | <b>World</b>   |
|-------------|------------------------|----------------|---------------|----------------|---------------|----------------|---------------|------------------|-----------------|----------------|
| 07-28-22    | 1 <sup>st</sup> ranked | <b>1307.40</b> | 90.99         | <b>87.36</b>   | 174.71        | 40.90          | <b>176.55</b> | <b>1876.66</b>   | <b>1653.73</b>  | <b>1152.49</b> |
|             | 2 <sup>nd</sup> ranked | 3228.21        | <b>82.70</b>  | 91.80          | <b>172.82</b> | 114.07         | 341.63        | 2195.80          | 1941.08         | 1241.66        |
|             | Ensemble (Weighted)    | <b>1307.40</b> | 90.99         | <b>87.36</b>   | 174.71        | 40.90          | <b>176.55</b> | <b>1876.66</b>   | <b>1653.73</b>  | <b>1152.49</b> |
|             | Ensemble (Unweighted)  | 1501.62        | 86.74         | 88.42          | <b>172.53</b> | <b>29.31</b>   | 236.46        | 2119.44          | 1905.29         | 1170.79        |
| 08-04-22    | 1 <sup>st</sup> ranked | 513.10         | <b>24.25</b>  | <b>99.60</b>   | 204.65        | 23.44          | 195.65        | 5524.23          | <b>5600.15</b>  | 2961.41        |
|             | 2 <sup>nd</sup> ranked | <b>483.25</b>  | 24.47         | 107.57         | <b>162.16</b> | <b>22.90</b>   | <b>106.63</b> | <b>1220.59</b>   | 17132.86        | 2577.23        |
|             | Ensemble (Weighted)    | 513.10         | <b>24.25</b>  | <b>99.60</b>   | 204.65        | 23.44          | 195.65        | 5524.23          | <b>5600.15</b>  | 2961.41        |
|             | Ensemble (Unweighted)  | 485.83         | 24.76         | 102.62         | 184.40        | 24.12          | 108.30        | 2724.37          | 6737.27         | <b>2565.84</b> |
| 08-11-22    | 1 <sup>st</sup> ranked | 116.98         | <b>11.86</b>  | <b>48.94</b>   | 206.31        | <b>22.16</b>   | <b>48.18</b>  | 1045.84          | 838.32          | 511.33         |
|             | 2 <sup>nd</sup> ranked | 135.49         | 13.76         | 76.46          | <b>180.87</b> | 73.47          | 185.03        | <b>407.53</b>    | <b>700.86</b>   | 423.42         |
|             | Ensemble (Weighted)    | 116.98         | <b>11.86</b>  | <b>48.94</b>   | 206.31        | <b>22.16</b>   | <b>48.18</b>  | 1045.84          | 838.32          | 511.33         |
|             | Ensemble (Unweighted)  | <b>102.19</b>  | 12.95         | 60.27          | 196.99        | 30.02          | 102.43        | 742.33           | 775.69          | <b>384.81</b>  |
| 08-18-22    | 1 <sup>st</sup> ranked | 376.04         | <b>9.7</b>    | <b>11.77</b>   | 228.39        | 28.67          | <b>60.4</b>   | 676.85           | 477.58          | <b>645.08</b>  |
|             | 2 <sup>nd</sup> ranked | <b>341.39</b>  | 33.19         | 30.48          | <b>215.18</b> | 43.62          | 399.73        | 712.06           | <b>203.62</b>   | 885.96         |
|             | Ensemble (Weighted)    | 376.04         | <b>9.7</b>    | <b>11.77</b>   | 228.39        | <b>28.67</b>   | <b>60.4</b>   | 676.85           | 477.58          | <b>645.08</b>  |
|             | Ensemble (Unweighted)  | 362.89         | 22.95         | 14.42          | 225.5         | 36.77          | 364.3         | <b>556.96</b>    | 422.07          | 746.89         |
| 08-25-22    | 1 <sup>st</sup> ranked | 154.1          | <b>7.09</b>   | 19.13          | 22.54         | <b>31.17</b>   | 31.84         | 972.14           | 377.49          | 716.45         |
|             | 2 <sup>nd</sup> ranked | 133.98         | 15.04         | <b>10.83</b>   | 31.33         | 54.38          | 74.27         | <b>821.92</b>    | <b>292.29</b>   | <b>696.84</b>  |
|             | Ensemble (Weighted)    | 154.1          | <b>7.09</b>   | 19.13          | 22.54         | <b>31.17</b>   | 31.84         | 972.14           | 377.49          | 716.45         |
|             | Ensemble (Unweighted)  | <b>128.79</b>  | 9.5           | 12.95          | <b>19.16</b>  | 39.88          | <b>24.53</b>  | 892.96           | 331.98          | 729.9          |
| 09-01-22    | 1 <sup>st</sup> ranked | <b>226.82</b>  | <b>7.22</b>   | 11.79          | 37.14         | <b>6.22</b>    | 73.35         | 776.82           | 208.93          | 823.08         |
|             | 2 <sup>nd</sup> ranked | 244.09         | 10.55         | 11.35          | 34.63         | 18.85          | 39.74         | <b>256.01</b>    | <b>126.26</b>   | 677.37         |
|             | Ensemble (Weighted)    | <b>226.82</b>  | <b>7.22</b>   | 11.79          | 37.14         | <b>6.22</b>    | 73.35         | 776.82           | 208.93          | 823.08         |
|             | Ensemble (Unweighted)  | 237.09         | 7.99          | <b>11.17</b>   | <b>16.47</b>  | 9.70           | <b>13.50</b>  | 621.87           | 184.41          | <b>418.90</b>  |
| 09-08-22    | 1 <sup>st</sup> ranked | 157.48         | 5.85          | <b>11.49</b>   | 43.49         | 11.67          | 12.21         | 642.87           | 164.77          | 1120.58        |
|             | 2 <sup>nd</sup> ranked | 156.00         | 7.82          | 22.72          | <b>20.63</b>  | <b>6.42</b>    | <b>10.95</b>  | <b>588.87</b>    | <b>149.85</b>   | <b>994.90</b>  |
|             | Ensemble (Weighted)    | 157.48         | 5.85          | <b>11.49</b>   | 43.49         | 11.67          | 12.21         | 642.87           | 164.77          | 1120.58        |
|             | Ensemble (Unweighted)  | <b>110.68</b>  | <b>5.83</b>   | 13.52          | 22.76         | 10.37          | 11.30         | 618.69           | 156.78          | 1054.48        |
| 09-15-22    | 1 <sup>st</sup> ranked | <b>171.27</b>  | <b>4.09</b>   | 16.82          | 35.83         | 6.28           | 14.54         | <b>368.93</b>    | <b>36.40</b>    | <b>523.75</b>  |
|             | 2 <sup>nd</sup> ranked | 1272.59        | 15.74         | 20.83          | <b>23.62</b>  | <b>4.55</b>    | 75.21         | 938.93           | 236.66          | 3730.62        |
|             | Ensemble (Weighted)    | <b>171.27</b>  | <b>4.09</b>   | 16.82          | 35.83         | 6.28           | 14.54         | <b>368.93</b>    | <b>36.40</b>    | <b>523.75</b>  |
|             | Ensemble (Unweighted)  | 337.08         | 5.59          | <b>15.03</b>   | 25.13         | 5.58           | <b>8.27</b>   | 404.45           | 91.64           | 1050.04        |

**Table 1s. Mean absolute errors (MAE) metric of the forecasts generated by the sub-epidemic models.** The mean absolute errors (MAE) metric of the forecasts generated by the sub-epidemic models over 8 sequential forecasting periods and for each geographical area. Values highlighted in bold correspond to best performing model during the forecasting period for a given area. There may be more than one value bolded for a given forecast period and country. This indicates that the bolded models performed equally well. Only forecast periods in which observed data was available are included.

| Week    | Model                  | Brazil            | Canada         | England         | France          | Germany        | Spain           | US (OWID)          | US (CDC)           | World             |
|---------|------------------------|-------------------|----------------|-----------------|-----------------|----------------|-----------------|--------------------|--------------------|-------------------|
| 7-28-22 | 1 <sup>st</sup> ranked | <b>2364049.19</b> | 10320.24       | <b>11615.61</b> | 80048.99        | 2506.33        | <b>39129.18</b> | <b>3841147.07</b>  | <b>2778792.34</b>  | <b>1597604.21</b> |
|         | 2 <sup>nd</sup> ranked | 16925765.93       | <b>8276.33</b> | 12500.64        | <b>70993.28</b> | 15632.66       | 137353.23       | 5009878.03         | 3792893.47         | 1804185.50        |
|         | Ensemble (Weighted)    | <b>2364049.19</b> | 10320.24       | <b>11615.61</b> | 80048.99        | 2506.33        | <b>39129.18</b> | <b>3841147.07</b>  | <b>2778792.34</b>  | <b>1597604.21</b> |
|         | Ensemble (Unweighted)  | 3184897.05        | 9230.12        | 11903.15        | 75643.17        | <b>1151.32</b> | 71912.88        | 4739459.68         | 3648248.53         | 1617873.05        |
| 8-04-22 | 1 <sup>st</sup> ranked | 322108.04         | 859.00         | <b>12512.59</b> | 90471.12        | 617.31         | 43823.72        | 40217736.19        | <b>38797623.51</b> | 10893647.67       |
|         | 2 <sup>nd</sup> ranked | <b>258364.19</b>  | <b>850.35</b>  | 13646.66        | <b>60875.53</b> | 678.16         | <b>16511.82</b> | <b>2313218.19</b>  | 457651393.86       | <b>6650709.10</b> |
|         | Ensemble (Weighted)    | 322108.04         | 859.00         | <b>12512.59</b> | 90471.12        | 617.31         | 43823.72        | 40217736.19        | <b>38797623.51</b> | 10893647.67       |
|         | Ensemble (Unweighted)  | 265627.4          | 878.62         | 12801.13        | 74574.77        | <b>593.18</b>  | 16328.29        | 8500892.42         | 57281239.98        | 7048019.09        |
| 8-11-22 | 1 <sup>st</sup> ranked | 20771.72          | <b>176.02</b>  | <b>4983.70</b>  | 92537.33        | <b>742.54</b>  | <b>2872.34</b>  | 1152686.27         | 711359.42          | 435608.17         |
|         | 2 <sup>nd</sup> ranked | 28835.70          | 262.01         | 6517.98         | <b>77711.78</b> | 6589.97        | 37471.21        | <b>203317.81</b>   | <b>504943.73</b>   | <b>206499.89</b>  |
|         | Ensemble (Weighted)    | 20771.72          | <b>176.02</b>  | <b>4983.70</b>  | 92537.33        | <b>742.54</b>  | <b>2872.34</b>  | 1152686.27         | 711359.42          | 435608.17         |
|         | Ensemble (Unweighted)  | <b>18051.77</b>   | 218.02         | 5119.08         | 88428.49        | 1427.14        | 14396.77        | 614876.18          | 609758.03          | 231478.04         |
| 8-18-22 | 1 <sup>st</sup> ranked | 179673.13         | <b>153.26</b>  | <b>261.77</b>   | 95708.70        | <b>1128.73</b> | <b>4949.63</b>  | 736308.70          | 245904.12          | <b>727711.73</b>  |
|         | 2 <sup>nd</sup> ranked | <b>148790.82</b>  | 1195.22        | 1084.46         | <b>88929.44</b> | 2369.84        | 161896.62       | 770797.59          | <b>79446.26</b>    | 1292512.11        |
|         | Ensemble (Weighted)    | 179673.13         | <b>153.26</b>  | <b>261.77</b>   | 95708.70        | <b>1128.73</b> | <b>4949.63</b>  | 736308.70          | 245904.12          | <b>727711.73</b>  |
|         | Ensemble (Unweighted)  | 165001.10         | 594.81         | 314.37          | 94223.70        | 1754.56        | 134229.87       | <b>598252.85</b>   | 200615.58          | 898035.03         |
| 8-25-22 | 1 <sup>st</sup> ranked | 41954.48          | <b>98.71</b>   | 483.35          | 805.69          | <b>1168.14</b> | 1574.15         | 1173259.62         | 152750.92          | 813000.99         |
|         | 2 <sup>nd</sup> ranked | 28943.29          | 284.95         | <b>143.33</b>   | 1538.58         | 2987.99        | 6369.42         | <b>888425.7711</b> | <b>94560.05</b>    | <b>790633.89</b>  |
|         | Ensemble (Weighted)    | 41954.48          | <b>98.71</b>   | 483.35          | 805.69          | <b>1168.14</b> | 1574.15         | 1173259.62         | 152750.92          | 813000.99         |
|         | Ensemble (Unweighted)  | <b>27364.56</b>   | 151.04         | 287.80          | <b>403.64</b>   | 1719.40        | <b>1125.78</b>  | 1015576.84         | 120862.39          | 834190.66         |
| 9-01-22 | 1 <sup>st</sup> ranked | <b>73078.49</b>   | <b>61.98</b>   | 250.16          | 1792.28         | <b>78.89</b>   | 5876.02         | 714440.86          | 56435.89           | 992196.47         |
|         | 2 <sup>nd</sup> ranked | 81670.49          | 144.59         | <b>170.67</b>   | 1772.04         | 399.19         | 2015.50         | <b>100213.29</b>   | <b>21634.49</b>    | 497612.85         |
|         | Ensemble (Weighted)    | <b>73078.49</b>   | <b>61.98</b>   | 250.16          | 1792.28         | <b>78.89</b>   | 5876.02         | 714440.86          | 56435.89           | 992196.47         |
|         | Ensemble (Unweighted)  | 78784.07          | 80.44          | 220.81          | <b>510.22</b>   | 143.79         | <b>264.46</b>   | 493508.74          | 46412.09           | <b>326677.47</b>  |
| 9-08-22 | 1 <sup>st</sup> ranked | 35058.06          | 58.73          | <b>182.38</b>   | 2494.38         | 146.86         | 272.99          | 565025.46          | 28528.03           | 1777396.54        |
|         | 2 <sup>nd</sup> ranked | 25019.09          | 76.08          | 725.15          | <b>507.58</b>   | <b>51.37</b>   | <b>144.12</b>   | <b>457688.84</b>   | <b>23812.47</b>    | <b>1383510.77</b> |
|         | Ensemble (Weighted)    | 35058.06          | 58.73          | <b>182.38</b>   | 2494.38         | 146.86         | 272.99          | 565025.46          | 28528.03           | 1777396.54        |
|         | Ensemble (Unweighted)  | <b>23324.14</b>   | <b>46.95</b>   | 204.79          | 998.69          | 117.86         | 166.66          | 519936.15          | 25883.95           | 1632965.52        |
| 9-15-22 | 1 <sup>st</sup> ranked | <b>31512.15</b>   | <b>23.23</b>   | 380.81          | 1941.18         | 60.25          | 278.07          | <b>172498.66</b>   | <b>1708.39</b>     | <b>395043.07</b>  |
|         | 2 <sup>nd</sup> ranked | 1813357.91        | 276.42         | 699.37          | <b>664.36</b>   | <b>23.13</b>   | 5720.43         | 1184513.80         | 57656.67           | 15477666.88       |
|         | Ensemble (Weighted)    | <b>31512.15</b>   | <b>23.23</b>   | 380.81          | 1941.18         | 60.25          | 278.07          | <b>172498.66</b>   | 1708.39            | <b>395043.07</b>  |
|         | Ensemble (Unweighted)  | 121858.32         | 44.39          | <b>260.88</b>   | 1065.67         | 44.77          | <b>76.74</b>    | 216304.99          | 8734.33            | 1467433.58        |

**Table 2s. Mean square errors (MSE) metric of the forecasts generated by the sub-epidemic models.** The mean square errors (MSE) metric of the forecasts generated by the sub-epidemic models over 8 sequential forecasting periods and for each geographical area. Values highlighted in bold correspond to best performing model during the forecasting period for a given area. There may be more than one value bolded for a given forecast period and country. This indicates that the bolded models performed equally well. Only forecast periods in which observed data was available are included.



**Table 3s. Percent coverage of the 95% PI metric of the forecasts generated by the sub-epidemic models.** The percent coverage of the 95% prediction interval (PI) metric of the forecasts generated by the sub-epidemic models over 8 sequential forecasting periods and for each geographical area. Values highlighted in bold correspond to best performing model during the forecasting period for a given area. There may be more than one value bolded for a given forecast period and country. This indicates that the bolded models performed equally well. Only forecast periods in which observed data was available are included.

| Week     | Model                  | Brazil         | Canada       | England      | France        | Germany      | Spain        | US (OWID)      | US (CDC)       | World          |
|----------|------------------------|----------------|--------------|--------------|---------------|--------------|--------------|----------------|----------------|----------------|
| 07-28-22 | 1 <sup>st</sup> ranked | <b>1040.18</b> | 79.75        | 60.75        | <b>120.88</b> | <b>24.55</b> | <b>93.64</b> | <b>1107.61</b> | <b>1013.06</b> | <b>628.79</b>  |
|          | 2 <sup>nd</sup> ranked | 2128.96        | <b>69.82</b> | 62.24        | 126.69        | 70.97        | 225.15       | 1835.73        | 1891.16        | 720.81         |
|          | Ensemble (Weighted)    | <b>1040.18</b> | 79.75        | 60.75        | <b>120.88</b> | <b>24.55</b> | <b>93.64</b> | <b>1107.61</b> | <b>1013.06</b> | <b>628.79</b>  |
|          | Ensemble (Unweighted)  | 1384.18        | 74.18        | <b>60.48</b> | 122.32        | 29.70        | 113.98       | 1376.73        | 1311.82        | 676.83         |
| 08-04-22 | 1 <sup>st</sup> ranked | <b>394.05</b>  | 16.48        | <b>67.01</b> | 155.85        | 13.51        | 91.93        | 4414.97        | <b>4580.72</b> | 1915.62        |
|          | 2 <sup>nd</sup> ranked | 447.96         | <b>15.76</b> | 69.17        | <b>126.96</b> | 13.51        | 92.72        | <b>697.57</b>  | 9284.33        | <b>1610.64</b> |
|          | Ensemble (Weighted)    | <b>394.05</b>  | 16.48        | <b>67.01</b> | 155.85        | 13.51        | 91.93        | 4414.97        | <b>4580.72</b> | 1915.62        |
|          | Ensemble (Unweighted)  | 412.27         | 16.04        | 68.13        | 138.94        | <b>13.13</b> | <b>81.48</b> | 1498.48        | 5567.13        | 1637.65        |
| 08-11-22 | 1 <sup>st</sup> ranked | 71.68          | <b>6.91</b>  | <b>35.46</b> | 161.83        | <b>14.44</b> | <b>62.34</b> | 550.30         | 712.04         | 358.12         |
|          | 2 <sup>nd</sup> ranked | 96.94          | 8.33         | 42.90        | <b>116.03</b> | 43.00        | 115.02       | <b>287.13</b>  | <b>479.62</b>  | <b>244.81</b>  |
|          | Ensemble (Weighted)    | 71.68          | <b>6.91</b>  | <b>35.46</b> | 161.83        | <b>14.44</b> | <b>62.34</b> | 550.30         | 712.04         | 358.12         |
|          | Ensemble (Unweighted)  | <b>57.72</b>   | 7.68         | 37.68        | 131.32        | 24.28        | 83.68        | 388.21         | 580.48         | 279.50         |
| 08-18-22 | 1 <sup>st</sup> ranked | 255.27         | <b>6.69</b>  | <b>9.42</b>  | 177.93        | <b>18.41</b> | <b>66.74</b> | <b>386.12</b>  | 339.92         | <b>405.01</b>  |
|          | 2 <sup>nd</sup> ranked | <b>217.68</b>  | 22.41        | 23.92        | <b>147.73</b> | 29.29        | 261.16       | 621.02         | 337.29         | 510.20         |
|          | Ensemble (Weighted)    | 255.27         | <b>6.69</b>  | <b>9.42</b>  | 177.93        | <b>18.41</b> | <b>66.74</b> | <b>386.12</b>  | 339.92         | <b>405.01</b>  |
|          | Ensemble (Unweighted)  | 234.53         | 11.95        | 14.37        | 161.09        | 22.95        | 141.33       | 430.33         | <b>270.76</b>  | 446.24         |
| 08-25-22 | 1 <sup>st</sup> ranked | <b>91.88</b>   | <b>4.96</b>  | 10.85        | <b>47.33</b>  | <b>18.90</b> | 51.96        | 628.12         | 234.08         | 441.09         |
|          | 2 <sup>nd</sup> ranked | 132.93         | 10.40        | <b>8.37</b>  | 71.68         | 33.98        | <b>44.06</b> | <b>424.17</b>  | <b>155.30</b>  | <b>433.50</b>  |
|          | Ensemble (Weighted)    | <b>91.88</b>   | <b>4.96</b>  | 10.85        | <b>47.33</b>  | <b>18.90</b> | 51.96        | 628.12         | 234.08         | 441.09         |
|          | Ensemble (Unweighted)  | 95.80          | 7.21         | 8.95         | 55.93         | 25.19        | 45.58        | 511.04         | 193.22         | 435.97         |
| 09-01-22 | 1 <sup>st</sup> ranked | 160.56         | <b>4.69</b>  | <b>7.77</b>  | 46.40         | <b>7.88</b>  | 48.60        | 465.91         | 127.59         | 530.15         |
|          | 2 <sup>nd</sup> ranked | <b>144.22</b>  | 7.42         | 8.54         | <b>43.69</b>  | 15.75        | <b>26.65</b> | 466.12         | 127.35         | 392.40         |
|          | Ensemble (Weighted)    | 160.56         | <b>4.69</b>  | <b>7.77</b>  | 46.40         | <b>7.88</b>  | 48.60        | 465.91         | 127.59         | 530.15         |
|          | Ensemble (Unweighted)  | 150.66         | 5.74         | <b>7.77</b>  | 45.07         | 10.83        | 31.94        | <b>380.37</b>  | <b>115.15</b>  | <b>333.79</b>  |
| 09-08-22 | 1 <sup>st</sup> ranked | 100.51         | <b>4.12</b>  | <b>7.13</b>  | <b>41.14</b>  | 6.31         | <b>17.10</b> | 399.84         | <b>91.87</b>   | 814.40         |
|          | 2 <sup>nd</sup> ranked | 122.09         | 6.25         | 14.66        | 49.34         | <b>5.13</b>  | 28.37        | <b>329.40</b>  | 113.29         | <b>626.04</b>  |
|          | Ensemble (Weighted)    | 100.51         | <b>4.12</b>  | <b>7.13</b>  | <b>41.14</b>  | 6.31         | <b>17.10</b> | 399.84         | <b>91.87</b>   | 814.40         |
|          | Ensemble (Unweighted)  | <b>89.02</b>   | 4.77         | 9.71         | 45.47         | 5.15         | 21.55        | 363.42         | 94.89          | 698.72         |
| 09-15-22 | 1 <sup>st</sup> ranked | <b>95.61</b>   | <b>7.80</b>  | <b>13.45</b> | <b>39.02</b>  | <b>5.92</b>  | <b>14.13</b> | <b>216.45</b>  | <b>46.88</b>   | <b>329.59</b>  |
|          | 2 <sup>nd</sup> ranked | 678.89         | 14.18        | 29.16        | 47.79         | 11.11        | 47.46        | 1733.14        | 162.57         | 2137.17        |
|          | Ensemble (Weighted)    | <b>95.61</b>   | <b>7.80</b>  | <b>13.45</b> | <b>39.02</b>  | <b>5.92</b>  | <b>14.13</b> | <b>216.45</b>  | <b>46.88</b>   | <b>329.59</b>  |
|          | Ensemble (Unweighted)  | 272.38         | 10.66        | 19.78        | 42.34         | 7.96         | 24.93        | 722.95         | 87.13          | 844.38         |

**Table 4s. Weighted Interval Score (WIS) metric of the forecasts generated by the sub-**

**epidemic models.** The weighted Interval Score (WIS) metric of the forecasts generated by the sub-epidemic models over 8 sequential forecasting periods and for each geographical area.

Values highlighted in bold correspond to best performing model during the forecasting period for a given area. There may be more than one value bolded for a given forecast period and country.

This indicates that the bolded models performed equally well. Only forecast periods in which observed data was available are included.

|                                                      | Model                   | Brazil       | Canada        | England       | France        | Germany       | Spain         | US (OWID)    | US (CDC)     | World         |
|------------------------------------------------------|-------------------------|--------------|---------------|---------------|---------------|---------------|---------------|--------------|--------------|---------------|
| Mean Absolute Error (MAE)                            | 1 <sup>st</sup> ranked* | <b>37.50</b> | <b>75.00</b>  | <b>62.50</b>  | 0.00          | <b>50.00</b>  | <b>37.50</b>  | 25.00        | 37.50        | <b>37.50</b>  |
|                                                      | 2 <sup>nd</sup> ranked  | 25.00        | 12.50         | 12.50         | <b>62.50</b>  | 37.50         | 25.00         | <b>62.50</b> | <b>62.50</b> | 25.00         |
|                                                      | Ensemble* (Weighted)    | <b>37.50</b> | <b>75.00</b>  | <b>62.50</b>  | 0.00          | <b>50.00</b>  | <b>37.50</b>  | 25.00        | 37.50        | <b>37.50</b>  |
|                                                      | Ensemble (Unweighted)   | <b>37.50</b> | 12.50         | 25.00         | 37.50         | 12.50         | <b>37.50</b>  | 12.50        | 0.00         | <b>37.50</b>  |
| Mean Square Error (MSE)                              | 1 <sup>st</sup> ranked* | <b>37.50</b> | <b>62.50</b>  | <b>62.50</b>  | 0.00          | <b>50.00</b>  | 37.50         | 25.00        | 37.50        | 37.50         |
|                                                      | 2 <sup>nd</sup> ranked  | 25.00        | 25.00         | 25.00         | <b>75.00</b>  | 25.00         | 12.50         | <b>62.50</b> | <b>62.50</b> | <b>50.00</b>  |
|                                                      | Ensemble* (Weighted)    | <b>37.50</b> | <b>62.50</b>  | <b>62.50</b>  | 0.00          | <b>50.00</b>  | 37.50         | 25.00        | 37.50        | 37.50         |
|                                                      | Ensemble (Unweighted)   | <b>37.50</b> | 12.50         | 12.50         | 25.00         | 25.00         | <b>50.00</b>  | 12.50        | 0.00         | 12.50         |
| Percent coverage of the 95% prediction interval (PI) | 1 <sup>st</sup> ranked* | 62.50        | <b>100.00</b> | 87.50         | 87.50         | <b>100.00</b> | <b>100.00</b> | 50.00        | 50.00        | 62.50         |
|                                                      | 2 <sup>nd</sup> ranked  | 62.50        | 87.50         | <b>100.00</b> | <b>100.00</b> | 87.50         | 75.00         | <b>87.50</b> | <b>87.50</b> | 87.50         |
|                                                      | Ensemble* (Weighted)    | 62.50        | <b>100.00</b> | 87.50         | 87.50         | <b>100.00</b> | <b>100.00</b> | 50.00        | 50.00        | 62.50         |
|                                                      | Ensemble (Unweighted)   | <b>87.50</b> | <b>100.00</b> | 87.50         | <b>100.00</b> | 87.50         | <b>100.00</b> | 75.00        | <b>87.50</b> | <b>100.00</b> |
| Weighted Interval Score (WIS)                        | 1 <sup>st</sup> ranked* | <b>50.00</b> | <b>75.00</b>  | <b>75.00</b>  | <b>50.00</b>  | <b>75.00</b>  | <b>62.50</b>  | 37.50        | <b>50.00</b> | 37.50         |
|                                                      | 2 <sup>nd</sup> ranked  | 25.00        | 25.00         | 12.50         | <b>50.00</b>  | 12.50         | 25.00         | <b>50.00</b> | 25.00        | <b>50.00</b>  |
|                                                      | Ensemble* (Weighted)    | <b>50.00</b> | <b>75.00</b>  | <b>75.00</b>  | <b>50.00</b>  | <b>75.00</b>  | <b>62.50</b>  | 37.50        | <b>50.00</b> | 37.50         |
|                                                      | Ensemble (Unweighted)   | 25.00        | 0.00          | 25.00         | 0.00          | 12.50         | 12.50         | 12.50        | 25.00        | 12.50         |

**Table 5s. Frequency a given model ranked the best for a given metric.** The frequency a given model ranked the best for a given metric generate for forecasts over the course of 8 sequential forecasting periods (July 28<sup>th</sup> – September 15<sup>th</sup>, 2022) for geographic regions included in the study. Frequencies are listed as the percent out of 100. \*The 1<sup>st</sup> ranked, and weighted ensemble forecasts were the exact same for every given metric and geographical region.

|                                                      | Model                  | Brazil*        | Canada*       | England*       | France*         | Germany*      | Spain*          | US* (OWID)      | US <sup>+</sup> (CDC) | World*          |
|------------------------------------------------------|------------------------|----------------|---------------|----------------|-----------------|---------------|-----------------|-----------------|-----------------------|-----------------|
| Mean Absolute Error (MAE)                            | Top-ranked             | 45.52          | 9.74          | 22.74          | 67.98           | 17.52         | 111.94          | 210.74          | 112.45                | 270.87          |
|                                                      | 2 <sup>nd</sup> ranked | <b>38.25</b>   | <b>8.80</b>   | <b>21.57</b>   | <b>61.85</b>    | <b>14.85</b>  | <b>82.73</b>    | <b>181.08</b>   | <b>97.51</b>          | <b>236.24</b>   |
| Mean Square Error (MSE)                              | Ensemble (Weighted)    | 45.52          | 9.74          | 22.74          | 67.98           | 17.52         | 111.94          | 210.74          | 112.45                | 270.87          |
|                                                      | Ensemble (Unweighted)  | 41.21          | 9.34          | 21.94          | 62.67           | 15.40         | 97.06           | 191.19          | 102.44                | 250.32          |
| Percent coverage of the 95% prediction interval (PI) | Top-ranked             | 3833.94        | <b>220.99</b> | 1215.30        | 12303.24        | 615.95        | 23202.07        | 93478.23        | 26323.77              | 123124.47       |
|                                                      | 2 <sup>nd</sup> ranked | <b>2795.90</b> | 224.38        | <b>1118.59</b> | <b>10393.44</b> | <b>446.15</b> | <b>13740.62</b> | <b>75456.03</b> | <b>20300.88</b>       | <b>92214.48</b> |
| Weighted Interval Score (WIS)                        | Ensemble (Weighted)    | 3833.94        | <b>220.99</b> | 1215.30        | 12303.24        | 615.95        | 23202.07        | 93478.23        | 26323.77              | 123124.47       |
|                                                      | Ensemble (Unweighted)  | 3150.86        | 221.88        | 1159.47        | 11197.14        | 483.93        | 17227.40        | 81207.31        | 21724.52              | 99542.69        |
| Percent coverage of the 95% prediction interval (PI) | Top-ranked             | <b>100.00</b>  | <b>100.00</b> | <b>100.00</b>  | 97.50           | <b>100.00</b> | <b>100.00</b>   | <b>100.00</b>   | <b>100.00</b>         | <b>100.00</b>   |
|                                                      | 2 <sup>nd</sup> ranked | <b>100.00</b>  | <b>100.00</b> | <b>100.00</b>  | <b>100.00</b>   | <b>100.00</b> | <b>100.00</b>   | <b>100.00</b>   | <b>100.00</b>         | <b>100.00</b>   |
| Weighted Interval Score (WIS)                        | Ensemble (Weighted)    | <b>100.00</b>  | <b>100.00</b> | <b>100.00</b>  | 97.50           | <b>100.00</b> | <b>100.00</b>   | <b>100.00</b>   | <b>100.00</b>         | <b>100.00</b>   |
|                                                      | Ensemble (Unweighted)  | <b>100.00</b>  | <b>100.00</b> | <b>100.00</b>  | <b>100.00</b>   | <b>100.00</b> | <b>100.00</b>   | <b>100.00</b>   | <b>100.00</b>         | <b>100.00</b>   |
| Percent coverage of the 95% prediction interval (PI) | Top-ranked             | 28.15          | <b>6.01</b>   | <b>14.95</b>   | <b>47.96</b>    | 11.62         | 70.21           | 143.71          | 72.45                 | 166.61          |
|                                                      | 2 <sup>nd</sup> ranked | 26.98          | 6.53          | 16.11          | 50.91           | 10.98         | <b>62.26</b>    | 142.61          | 70.46                 | 164.27          |
| Weighted Interval Score (WIS)                        | Ensemble (Weighted)    | 28.15          | <b>6.01</b>   | <b>14.95</b>   | <b>47.96</b>    | 11.62         | 70.21           | 143.71          | 72.45                 | 166.61          |
|                                                      | Ensemble (Unweighted)  | <b>26.67</b>   | 6.15          | 15.26          | 48.42           | <b>10.89</b>  | 63.41           | <b>139.32</b>   | <b>68.27</b>          | <b>159.34</b>   |

**Table 6s. Mean performance metrics quantifying model fit.** The mean performance metrics quantifying model fit across 20 sequential 10-week calibration periods (Week of May 26<sup>th</sup> – October 13<sup>th</sup>, 2022) using weekly timeseries data from the CDC<sup>†</sup> and OWID<sup>\*</sup> teams for each geographical region. Values highlighted in bold correspond to best performing model during the forecasting period for a given area. There may be more than one value bolded for a given forecast period and country. This indicates that the bolded models performed equally well. Only forecast periods in which observed data was available are included.

| Week     | Model                  | Brazil       | Canada       | England      | France       | Germany      | Spain         | US (OWID)     | US (CDC)      | World         |
|----------|------------------------|--------------|--------------|--------------|--------------|--------------|---------------|---------------|---------------|---------------|
| 07-28-22 | 1 <sup>st</sup> ranked | 21.64        | 6.03         | <b>26.54</b> | 36.44        | 22.26        | 138.62        | 123.71        | 138.91        | <b>146.21</b> |
|          | 2 <sup>nd</sup> ranked | <b>19.56</b> | <b>4.37</b>  | 26.95        | <b>35.65</b> | <b>13.63</b> | <b>104.59</b> | <b>74.53</b>  | <b>20.75</b>  | 146.53        |
|          | Ensemble (Weighted)    | 21.64        | 6.03         | <b>26.54</b> | 36.44        | 22.26        | 138.62        | 123.71        | 138.91        | <b>146.21</b> |
|          | Ensemble (Unweighted)  | 20.23        | 5.03         | 26.62        | 36.51        | 17.53        | 117.97        | 86.41         | 55.22         | 147.68        |
| 08-04-22 | 1 <sup>st</sup> ranked | 32.06        | 7.54         | 28.73        | 42.42        | 21.80        | 133.46        | 162.67        | 173.45        | 175.95        |
|          | 2 <sup>nd</sup> ranked | <b>13.08</b> | <b>7.39</b>  | <b>23.94</b> | <b>30.07</b> | <b>12.21</b> | 129.05        | <b>128.86</b> | <b>167.53</b> | <b>154.76</b> |
|          | Ensemble (Weighted)    | 32.06        | 7.54         | 28.73        | 42.42        | 21.80        | 133.46        | 162.67        | 173.45        | 175.95        |
|          | Ensemble (Unweighted)  | 19.48        | 7.57         | 26.86        | 35.70        | 13.65        | <b>126.69</b> | 148.16        | 170.89        | 163.80        |
| 08-11-22 | 1 <sup>st</sup> ranked | 29.97        | 6.75         | 27.21        | <b>47.67</b> | 17.05        | 131.51        | <b>210.55</b> | 59.41         | 269.48        |
|          | 2 <sup>nd</sup> ranked | <b>25.05</b> | <b>5.16</b>  | <b>22.75</b> | 50.76        | 17.39        | <b>106.04</b> | 218.29        | <b>52.98</b>  | <b>214.71</b> |
|          | Ensemble (Weighted)    | 29.97        | 6.75         | 27.21        | <b>47.67</b> | 17.05        | 131.51        | <b>210.55</b> | 59.41         | 269.48        |
|          | Ensemble (Unweighted)  | 27.27        | 6.05         | 25.12        | 48.81        | <b>16.67</b> | 115.69        | 216.37        | 58.57         | 250.58        |
| 08-18-22 | 1 <sup>st</sup> ranked | 36.75        | 7.31         | 20.09        | 41.20        | 17.06        | 132.46        | 229.51        | 79.16         | 252.74        |
|          | 2 <sup>nd</sup> ranked | <b>30.66</b> | <b>6.21</b>  | <b>18.82</b> | <b>39.85</b> | <b>13.31</b> | <b>81.08</b>  | <b>221.78</b> | <b>76.35</b>  | <b>222.85</b> |
|          | Ensemble (Weighted)    | 36.75        | 7.31         | 20.09        | 41.20        | 17.06        | 132.46        | 229.51        | 79.16         | 252.74        |
|          | Ensemble (Unweighted)  | 33.41        | 6.88         | 19.74        | 42.07        | 14.48        | 116.62        | 222.58        | 77.81         | 241.85        |
| 08-25-22 | 1 <sup>st</sup> ranked | 47.44        | 6.29         | 15.60        | 101.45       | 15.21        | 133.56        | 229.45        | <b>82.96</b>  | 319.08        |
|          | 2 <sup>nd</sup> ranked | <b>44.26</b> | <b>5.12</b>  | <b>12.04</b> | <b>94.66</b> | <b>12.28</b> | <b>95.30</b>  | 221.37        | 90.28         | <b>292.14</b> |
|          | Ensemble (Weighted)    | 47.44        | 6.29         | 15.60        | 101.45       | 15.21        | 133.56        | 229.45        | <b>82.96</b>  | 319.08        |
|          | Ensemble (Unweighted)  | 44.77        | 5.58         | 12.63        | 95.60        | 13.34        | 116.65        | <b>221.15</b> | 86.33         | 306.17        |
| 09-01-22 | 1 <sup>st</sup> ranked | 46.08        | 10.37        | <b>10.77</b> | 93.91        | <b>17.92</b> | 116.77        | 260.35        | <b>95.67</b>  | 340.84        |
|          | 2 <sup>nd</sup> ranked | <b>42.81</b> | <b>9.97</b>  | 11.30        | 89.97        | 20.50        | <b>42.21</b>  | <b>220.45</b> | 101.14        | <b>289.47</b> |
|          | Ensemble (Weighted)    | 46.08        | 10.37        | <b>10.77</b> | 93.91        | <b>17.92</b> | 116.77        | 260.35        | <b>95.67</b>  | 340.84        |
|          | Ensemble (Unweighted)  | 43.42        | 10.15        | 10.84        | <b>80.17</b> | 18.73        | 77.48         | 241.06        | 98.09         | 296.05        |
| 09-08-22 | 1 <sup>st</sup> ranked | 55.98        | 8.05         | 12.05        | 90.95        | <b>6.51</b>  | 59.83         | 243.95        | <b>138.23</b> | 267.55        |
|          | 2 <sup>nd</sup> ranked | <b>51.01</b> | <b>7.07</b>  | 12.00        | <b>78.91</b> | 6.94         | <b>57.48</b>  | 245.35        | 142.29        | <b>257.11</b> |
|          | Ensemble (Weighted)    | 55.98        | 8.05         | 12.05        | 90.95        | <b>6.51</b>  | 59.83         | 243.95        | <b>138.23</b> | 267.55        |
|          | Ensemble (Unweighted)  | 52.96        | 7.70         | <b>11.73</b> | 81.74        | 6.53         | 58.32         | <b>242.55</b> | 140.89        | 264.78        |
| 09-15-22 | 1 <sup>st</sup> ranked | 94.28        | 25.60        | <b>40.95</b> | 89.78        | 22.38        | 49.27         | 225.75        | 131.85        | 395.12        |
|          | 2 <sup>nd</sup> ranked | <b>79.60</b> | <b>25.08</b> | 44.78        | <b>74.89</b> | 22.51        | <b>46.09</b>  | <b>118.04</b> | <b>128.79</b> | <b>312.35</b> |
|          | Ensemble (Weighted)    | 94.28        | 25.60        | <b>40.95</b> | 89.78        | 22.38        | 49.27         | 225.75        | 131.85        | 395.12        |
|          | Ensemble (Unweighted)  | 88.13        | 25.78        | 41.95        | 80.77        | <b>22.30</b> | 47.05         | 151.23        | 131.69        | 331.61        |

**Table 7s. Mean absolute error (MAE) metrics quantifying model fit.** The mean absolute error (MAE) metrics quantifying model fit across 20 sequential 10-week calibration periods (Week of May 26<sup>th</sup> – October 13<sup>th</sup>, 2022) used during forecasting periods for the given geographical regions. Values highlighted in bold correspond to best performing model during the forecasting period for a given area. There may be more than one value bolded for a given forecast period and country. This indicates that the bolded models performed equally well. Only forecast periods in which observed data was available are included.

| Week     | Model                  | Brazil         | Canada         | England        | France          | Germany       | Spain           | US (OWID)        | US (CDC)        | World            |
|----------|------------------------|----------------|----------------|----------------|-----------------|---------------|-----------------|------------------|-----------------|------------------|
| 07-28-22 | 1 <sup>st</sup> ranked | 797.18         | 69.02          | <b>1084.19</b> | 2964.07         | 936.01        | 32577.00        | 37426.62         | 41061.16        | 35401.61         |
|          | 2 <sup>nd</sup> ranked | <b>517.01</b>  | <b>38.92</b>   | 1130.97        | <b>2396.74</b>  | <b>266.33</b> | <b>23107.15</b> | <b>11310.19</b>  | <b>993.61</b>   | <b>34107.69</b>  |
|          | Ensemble (Weighted)    | 797.18         | 69.02          | <b>1084.19</b> | 2964.07         | 936.01        | 32577.00        | 37426.62         | 41061.16        | 35401.61         |
|          | Ensemble (Unweighted)  | 638.21         | 50.24          | 1097.57        | 2609.83         | 460.37        | 26537.40        | 16583.00         | 6469.11         | 35066.30         |
| 08-04-22 | 1 <sup>st</sup> ranked | 1778.58        | 89.70          | 1210.71        | 2986.61         | 815.99        | 31839.75        | 73858.07         | 74580.14        | 52914.01         |
|          | 2 <sup>nd</sup> ranked | <b>328.41</b>  | <b>87.18</b>   | <b>892.64</b>  | <b>1377.14</b>  | <b>296.36</b> | <b>26130.86</b> | <b>42452.64</b>  | <b>63253.40</b> | <b>33827.46</b>  |
|          | Ensemble (Weighted)    | 1778.58        | 89.70          | 1210.71        | 2986.61         | 815.99        | 31839.75        | 73858.07         | 74580.14        | 52914.01         |
|          | Ensemble (Unweighted)  | 598.69         | 90.25          | 1087.66        | 2097.18         | 410.45        | 28603.31        | 59515.87         | 70969.79        | 41772.18         |
| 08-11-22 | 1 <sup>st</sup> ranked | 2037.12        | 64.00          | 1160.27        | <b>3400.90</b>  | 610.48        | 31954.23        | 101526.93        | 6266.19         | 103584.14        |
|          | 2 <sup>nd</sup> ranked | <b>1029.36</b> | <b>45.50</b>   | <b>841.49</b>  | 3673.42         | 597.38        | <b>19598.69</b> | <b>99956.47</b>  | <b>6178.18</b>  | <b>73762.56</b>  |
|          | Ensemble (Weighted)    | 2037.12        | 64.00          | 1160.27        | <b>3400.90</b>  | 610.48        | 31954.23        | 101526.93        | 6266.19         | 103584.14        |
|          | Ensemble (Unweighted)  | 1415.44        | 53.21          | 1026.27        | 3475.13         | <b>566.17</b> | 23555.35        | 102836.07        | 6335.19         | 89546.09         |
| 08-18-22 | 1 <sup>st</sup> ranked | 2180.36        | 74.93          | <b>645.32</b>  | <b>2746.61</b>  | 512.74        | 32008.76        | 104611.47        | 10241.78        | 107034.19        |
|          | 2 <sup>nd</sup> ranked | <b>1976.88</b> | <b>62.10</b>   | 645.74         | 2753.31         | <b>439.24</b> | <b>15225.73</b> | 102405.02        | 10154.03        | <b>83580.23</b>  |
|          | Ensemble (Weighted)    | 2180.36        | 74.93          | <b>645.32</b>  | <b>2746.61</b>  | 512.74        | 32008.76        | 104611.47        | 10241.78        | 107034.19        |
|          | Ensemble (Unweighted)  | 2035.91        | 67.27          | 651.19         | 2789.54         | 469.14        | 23514.26        | <b>102339.35</b> | <b>9852.72</b>  | 95498.10         |
| 08-25-22 | 1 <sup>st</sup> ranked | 3629.89        | 58.78          | 380.95         | 22578.97        | 492.25        | 29041.11        | 107625.64        | <b>14990.15</b> | 145361.68        |
|          | 2 <sup>nd</sup> ranked | <b>2632.41</b> | <b>53.06</b>   | 268.86         | <b>17902.65</b> | <b>279.30</b> | <b>14942.30</b> | <b>100406.00</b> | 15976.68        | <b>116437.94</b> |
|          | Ensemble (Weighted)    | 3629.89        | 58.78          | 380.95         | 22578.97        | 492.25        | 29041.11        | 107625.64        | <b>14990.15</b> | 145361.68        |
|          | Ensemble (Unweighted)  | 3001.05        | 54.66          | <b>265.87</b>  | 20042.38        | 369.12        | 20419.05        | 103700.44        | 15331.37        | 133545.45        |
| 09-01-22 | 1 <sup>st</sup> ranked | 3622.06        | <b>147.75</b>  | <b>245.07</b>  | 21616.42        | <b>740.96</b> | 19695.80        | 116488.17        | 17498.43        | 174865.61        |
|          | 2 <sup>nd</sup> ranked | <b>2933.55</b> | 151.40         | 257.32         | <b>17678.92</b> | 838.36        | <b>3412.73</b>  | 110619.95        | <b>17271.81</b> | 142329.80        |
|          | Ensemble (Weighted)    | 3622.06        | <b>147.75</b>  | <b>245.07</b>  | 21616.42        | <b>740.96</b> | 19695.80        | 116488.17        | 17498.43        | 174865.61        |
|          | Ensemble (Unweighted)  | 3056.94        | 149.02         | 251.09         | 18995.35        | 770.86        | 7351.48         | <b>108100.31</b> | 17604.84        | <b>121988.23</b> |
| 09-08-22 | 1 <sup>st</sup> ranked | 4172.76        | 101.17         | 270.48         | 21313.98        | 111.68        | 4612.78         | 114765.99        | <b>24014.42</b> | 107287.31        |
|          | 2 <sup>nd</sup> ranked | <b>3745.92</b> | <b>96.00</b>   | <b>254.58</b>  | <b>20296.42</b> | 114.99        | <b>4316.43</b>  | <b>107104.49</b> | 26269.55        | <b>105033.78</b> |
|          | Ensemble (Weighted)    | 4172.76        | 101.17         | 270.48         | 21313.98        | 111.68        | 4612.78         | 114765.99        | <b>24014.42</b> | 107287.31        |
|          | Ensemble (Unweighted)  | 3822.69        | 98.69          | 257.00         | 20353.34        | <b>110.65</b> | 4413.96         | 109812.89        | 25256.66        | 106099.55        |
| 09-15-22 | 1 <sup>st</sup> ranked | 12453.56       | <b>1162.51</b> | 4725.45        | 20818.35        | <b>707.49</b> | 3887.13         | 91522.97         | <b>21937.91</b> | 258547.18        |
|          | 2 <sup>nd</sup> ranked | <b>9203.64</b> | 1260.88        | 4657.13        | <b>17068.89</b> | 737.19        | <b>3191.04</b>  | <b>29393.45</b>  | 22309.78        | <b>148636.39</b> |
|          | Ensemble (Weighted)    | 12453.56       | <b>1162.51</b> | 4725.45        | 20818.35        | <b>707.49</b> | 3887.13         | 91522.97         | <b>21937.91</b> | 258547.18        |
|          | Ensemble (Unweighted)  | 10637.98       | 1211.67        | <b>4639.07</b> | 19214.38        | 714.72        | 3424.40         | 46770.58         | 21976.45        | 172825.59        |

**Table 8s. Mean square error (MSE) metrics quantifying model fit.** The mean square error (MSE) metrics quantifying model fit across 20 sequential 10-week calibration periods (Week of May 26<sup>th</sup> – October 13<sup>th</sup>, 2022) used during forecasting periods for the given geographical regions. Values highlighted in bold correspond to best performing model during the forecasting period for a given area. There may be more than one value bolded for a given forecast period and country. This indicates that the bolded models performed equally well. Only forecast periods in which observed data was available are included.



**Table 9s. Percent coverage of the 95% (PI) metrics quantifying model fit.** The percent coverage of the 95% prediction interval (PI) metrics quantifying model fit across 20 sequential 10-week calibration periods (Week of May 26<sup>th</sup> – October 13<sup>th</sup>, 2022) used during forecasting periods for the given geographical regions. Values highlighted in bold correspond to best performing model during the forecasting period for a given area. There may be more than one value bolded for a given forecast period and country. This indicates that the bolded models performed equally well. Only forecast periods in which observed data was available are included.

| Week     | Model                  | Brazil       | Canada       | England      | France       | Germany      | Spain        | US (OWID)     | US (CDC)      | World         |
|----------|------------------------|--------------|--------------|--------------|--------------|--------------|--------------|---------------|---------------|---------------|
| 07-28-22 | 1 <sup>st</sup> ranked | <b>13.38</b> | 4.02         | <b>15.72</b> | <b>25.51</b> | 14.43        | 86.47        | 86.45         | 90.11         | <b>92.74</b>  |
|          | 2 <sup>nd</sup> ranked | 14.76        | <b>3.51</b>  | 18.65        | 26.21        | <b>9.70</b>  | 83.34        | <b>58.45</b>  | <b>18.52</b>  | 102.60        |
|          | Ensemble (Weighted)    | <b>13.38</b> | 4.02         | <b>15.72</b> | <b>25.51</b> | 14.43        | 86.47        | 86.45         | 90.11         | <b>92.74</b>  |
|          | Ensemble (Unweighted)  | 13.57        | 3.66         | 16.96        | 25.98        | 11.18        | <b>83.17</b> | 68.32         | 39.64         | 95.85         |
| 08-04-22 | 1 <sup>st</sup> ranked | 19.76        | <b>4.78</b>  | 17.19        | 26.54        | 13.84        | <b>85.33</b> | 122.64        | 124.34        | 112.68        |
|          | 2 <sup>nd</sup> ranked | <b>11.32</b> | 5.22         | <b>15.96</b> | <b>20.27</b> | <b>8.50</b>  | 92.79        | <b>105.21</b> | 126.40        | 114.76        |
|          | Ensemble (Weighted)    | 19.76        | <b>4.78</b>  | 17.19        | 26.54        | 13.84        | <b>85.33</b> | 122.64        | 124.34        | 112.68        |
|          | Ensemble (Unweighted)  | 13.52        | 4.93         | 16.34        | 22.97        | 10.24        | 87.34        | 112.64        | <b>123.26</b> | <b>107.80</b> |
| 08-11-22 | 1 <sup>st</sup> ranked | 20.97        | 3.99         | 16.51        | <b>29.12</b> | <b>11.69</b> | 86.20        | <b>143.87</b> | <b>37.99</b>  | 159.13        |
|          | 2 <sup>nd</sup> ranked | <b>17.14</b> | <b>3.76</b>  | <b>16.17</b> | 33.54        | 13.49        | <b>79.14</b> | 165.48        | 42.95         | 148.37        |
|          | Ensemble (Weighted)    | 20.97        | 3.99         | 16.51        | <b>29.12</b> | <b>11.69</b> | 86.20        | <b>143.87</b> | <b>37.99</b>  | 159.13        |
|          | Ensemble (Unweighted)  | 18.08        | 3.81         | 16.21        | 30.74        | 12.23        | 80.72        | 150.92        | 39.19         | <b>148.23</b> |
| 08-18-22 | 1 <sup>st</sup> ranked | <b>23.72</b> | 4.29         | <b>12.52</b> | <b>26.06</b> | 11.12        | 86.47        | <b>157.02</b> | <b>49.85</b>  | 158.50        |
|          | 2 <sup>nd</sup> ranked | 25.52        | 4.40         | 13.82        | 29.24        | 11.24        | <b>71.47</b> | 173.19        | 56.66         | 163.29        |
|          | Ensemble (Weighted)    | <b>23.72</b> | 4.29         | <b>12.52</b> | <b>26.06</b> | 11.12        | 86.47        | <b>157.02</b> | <b>49.85</b>  | 158.50        |
|          | Ensemble (Unweighted)  | 24.25        | <b>4.25</b>  | 12.95        | 27.34        | <b>10.95</b> | 71.97        | 161.47        | 51.94         | <b>156.79</b> |
| 08-25-22 | 1 <sup>st</sup> ranked | 29.30        | <b>3.80</b>  | 9.66         | 71.59        | 10.82        | 82.80        | <b>157.60</b> | <b>60.34</b>  | 191.08        |
|          | 2 <sup>nd</sup> ranked | 29.30        | 4.17         | 9.33         | 73.98        | <b>8.55</b>  | <b>68.30</b> | 171.48        | 69.97         | <b>173.72</b> |
|          | Ensemble (Weighted)    | 29.30        | <b>3.80</b>  | 9.66         | 71.59        | 10.82        | 82.80        | <b>157.60</b> | <b>60.34</b>  | 191.08        |
|          | Ensemble (Unweighted)  | <b>28.40</b> | 3.91         | <b>8.98</b>  | <b>71.07</b> | 9.35         | 72.68        | 162.33        | 64.31         | 179.59        |
| 09-01-22 | 1 <sup>st</sup> ranked | 29.73        | <b>6.02</b>  | <b>7.82</b>  | <b>69.77</b> | <b>13.10</b> | 69.82        | <b>166.63</b> | <b>65.03</b>  | 206.93        |
|          | 2 <sup>nd</sup> ranked | <b>28.80</b> | 6.72         | 9.05         | 73.95        | 15.61        | <b>33.94</b> | 185.35        | 75.72         | 214.27        |
|          | Ensemble (Weighted)    | 29.73        | <b>6.02</b>  | <b>7.82</b>  | <b>69.77</b> | <b>13.10</b> | 69.82        | <b>166.63</b> | <b>65.03</b>  | 206.93        |
|          | Ensemble (Unweighted)  | 28.92        | 6.29         | 8.29         | 69.98        | 14.15        | 45.63        | 173.94        | 68.50         | <b>191.47</b> |
| 09-08-22 | 1 <sup>st</sup> ranked | <b>32.31</b> | <b>4.97</b>  | <b>8.19</b>  | <b>67.95</b> | <b>5.13</b>  | <b>34.11</b> | <b>165.41</b> | <b>77.75</b>  | <b>163.05</b> |
|          | 2 <sup>nd</sup> ranked | 34.34        | 5.52         | 8.89         | 76.69        | 5.89         | 37.05        | 182.97        | 88.51         | 179.88        |
|          | Ensemble (Weighted)    | <b>32.31</b> | <b>4.97</b>  | <b>8.19</b>  | <b>67.95</b> | <b>5.13</b>  | <b>34.11</b> | <b>165.41</b> | <b>77.75</b>  | <b>163.05</b> |
|          | Ensemble (Unweighted)  | 32.49        | 5.16         | 8.46         | 71.12        | 5.38         | 35.04        | 171.57        | 81.72         | 170.66        |
| 09-15-22 | 1 <sup>st</sup> ranked | 56.03        | <b>16.20</b> | <b>32.01</b> | <b>67.17</b> | <b>12.84</b> | <b>30.46</b> | 150.05        | <b>74.15</b>  | 248.77        |
|          | 2 <sup>nd</sup> ranked | 54.65        | 18.92        | 37.02        | 73.39        | 14.84        | 32.05        | <b>98.72</b>  | 84.95         | <b>217.31</b> |
|          | Ensemble (Weighted)    | 56.03        | <b>16.20</b> | <b>32.01</b> | <b>67.17</b> | <b>12.84</b> | <b>30.46</b> | 150.05        | <b>74.15</b>  | 248.77        |
|          | Ensemble (Unweighted)  | <b>54.12</b> | 17.21        | 33.88        | 68.16        | 13.67        | 30.73        | 113.33        | 77.60         | 224.32        |

**Table 10s. Weighted interval score (WIS) metrics quantifying model fit.** The weighted interval score (WIS) metrics quantifying model fit across 20 sequential 10-week calibration periods (Week of May 26<sup>th</sup> – October 13<sup>th</sup>, 2022) used during forecasting periods for the given geographical regions. Values highlighted in bold correspond to best performing model during the forecasting period for a given area. There may be more than one value bolded for a given forecast period and country. This indicates that the bolded models performed equally well. Only forecast periods in which observed data was available are included.

| Second-Ranked Model |        |         |        |         |         |         |        |           |          |           |
|---------------------|--------|---------|--------|---------|---------|---------|--------|-----------|----------|-----------|
| Week                |        | Brazil  | Canada | England | France  | Germany | Spain  | US (OWID) | US (CDC) | World     |
| 07-28-22            | Median | 16102.9 | 698.1  | 861.7   | 935.2   | 1189.0  | 3483.8 | 3448.7    | 2573.8   | 20604.8   |
|                     | LB     | 6096.9  | 565.7  | 186.1   | 93.8    | 550.1   | 1078.3 | 1679.7    | 1921.9   | 13073.0   |
|                     | UB     | 39180.3 | 833.1  | 2026.9  | 2350.8  | 2868.0  | 6915.3 | 7389.5    | 3134.8   | 30896.7   |
| 08-04-22            | Median | 1295.2  | 386.4  | 702.7   | 795.3   | 512.5   | 1835.7 | 12011.9   | 72771.3  | 33511.9   |
|                     | LB     | 925.5   | 177.4  | 201.7   | 187.8   | 180.4   | 0.0    | 4640.2    | 6186.8   | 19185.0   |
|                     | UB     | 1689.7  | 762.7  | 1601.6  | 1529.4  | 797.9   | 6369.0 | 23275.5   | 159904.1 | 65275.2   |
| 08-11-22            | Median | 3668.9  | 263.6  | 557.5   | 476.7   | 651.7   | 1945.2 | 8652.7    | 4803.5   | 20910.2   |
|                     | LB     | 3017.8  | 125.6  | 68.4    | 0.0     | 145.3   | 0.0    | 1790.0    | 2688.0   | 15426.7   |
|                     | UB     | 4412.5  | 399.1  | 1103.9  | 4121.0  | 1540.3  | 5362.3 | 24943.3   | 7276.3   | 27280.5   |
| 08-18-22            | Median | 1770.8  | 330.8  | 386.9   | 261.3   | 431.2   | 2516.3 | 9344.5    | 5083.5   | 16790.7   |
|                     | LB     | 650.9   | 196.0  | 17.4    | 0.0     | 97.5    | 647.2  | 1288.9    | 2617.6   | 10550.5   |
|                     | UB     | 3767.3  | 485.9  | 2132.6  | 1210.2  | 849.1   | 4402.7 | 32128.1   | 11648.3  | 25842.3   |
| 08-25-22            | Median | 3034.9  | 222.7  | 216.5   | 592.4   | 362.7   | 401.5  | 4296.7    | 4047.7   | 15331.8   |
|                     | LB     | 1037.6  | 75.4   | 15.8    | 0.0     | 128.4   | 0.0    | 369.0     | 1682.3   | 10176.1   |
|                     | UB     | 27926.0 | 1145.7 | 508.3   | 12679.9 | 585.5   | 2296.1 | 11480.4   | 6690.7   | 21986.0   |
| 09-01-22            | Median | 1615.7  | 146.5  | 165.2   | 305.3   | 219.0   | 305.9  | 7213.8    | 3184.7   | 17921.9   |
|                     | LB     | 638.5   | 0.0    | 0.0     | 0.0     | 0.0     | 0.0    | 279.2     | 1740.5   | 11869.3   |
|                     | UB     | 3777.4  | 384.7  | 467.5   | 3053.3  | 774.3   | 1179.2 | 108959.8  | 4702.4   | 24638.6   |
| 09-08-22            | Median | 2572.8  | 108.8  | 195.2   | 382.4   | 90.8    | 362.6  | 3592.6    | 2540.1   | 9916.2    |
|                     | LB     | 765.2   | 0.0    | 0.0     | 0.0     | 0.0     | 0.0    | 0.0       | 943.9    | 4243.7    |
|                     | UB     | 22643.0 | 597.8  | 555.4   | 2912.5  | 365.8   | 1676.5 | 9732.7    | 4298.7   | 21199.2   |
| 09-15-22            | Median | 6784.5  | 125.7  | 249.4   | 304.4   | 108.8   | 516.6  | 7584.4    | 2502.8   | 24432.4   |
|                     | LB     | 1031.7  | 0.0    | 0.0     | 0.0     | 0.0     | 0.0    | 1426.7    | 940.1    | 10430.3   |
|                     | UB     | 11736.4 | 797.4  | 1759.9  | 3026.6  | 793.5   | 2908.5 | 283241.3  | 4173.2   | 58026.3   |
| 09-22-22            | Median | 1404.9  | 128.3  | 121.8   | 400.8   | 138.8   | 159.9  | 4464.6    | 2242.4   | 11317.7   |
|                     | LB     | 23.0    | 0.0    | 0.0     | 0.0     | 0.0     | 0.0    | 102.9     | 411.5    | 1876.8    |
|                     | UB     | 3777.2  | 1874.2 | 1363.8  | 2546.3  | 956.8   | 548.2  | 16090.2   | 4805.1   | 1521252.0 |
| 09-29-22            | Median | 942.9   | 28.7   | 411.7   | 271.7   | 106.6   | 352.6  | 5275.8    | 1759.7   | 11260.9   |
|                     | LB     | 0.0     | 0.0    | 0.0     | 0.0     | 0.0     | 0.0    | 317.9     | 227.2    | 1405.9    |
|                     | UB     | 4356.1  | 169.3  | 1473.2  | 6776.6  | 358.0   | 1031.4 | 10158.9   | 3703.1   | 32533.4   |
| 10-06-22            | Median | 1328.6  | 55.7   | 4.4     | 343.6   | 126.9   | 94.6   | 2005.9    | 756.3    | 6075.6    |
|                     | LB     | 0.0     | 0.0    | 0.0     | 0.0     | 0.0     | 0.0    | 0.0       | 84.3     | 0.0       |
|                     | UB     | 6414.1  | 221.7  | 599.9   | 10883.7 | 638.0   | 500.0  | 8133.4    | 1627.7   | 15271.4   |
| 10-13-22            | Median | 1044.6  | 39.5   | 25.7    | 70.0    | 72.5    | 147.5  | 1768.7    | 579.2    | 3393.7    |
|                     | LB     | 0.0     | 0.0    | 0.0     | 0.0     | 0.0     | 0.0    | 0.0       | 0.0      | 0.0       |
|                     | UB     | 3970.7  | 232.6  | 192.3   | 1686.1  | 178.7   | 681.0  | 6361.3    | 1652.4   | 13340.1   |

**Table 11s. Predicted cumulative number of newly forecasted monkeypox cases and 95% PIs for the second-ranked model.** Predicted cumulative number of newly forecasted monkeypox cases and 95% PIs for each of the 4-week ahead forecasts during the weeks of 7-28-2022 through 10-13-2022 based on a 10-week calibration period for the second-ranked sub-epidemic model.

| Weighted - Ensemble Model |        |         |        |         |        |         |        |           |          |         |
|---------------------------|--------|---------|--------|---------|--------|---------|--------|-----------|----------|---------|
| Week                      |        | Brazil  | Canada | England | France | Germany | Spain  | US (OWID) | US (CDC) | World   |
| 07-28-22                  | Median | 8463.7  | 742.3  | 773.9   | 872.4  | 591.2   | 1391.2 | 4838.8    | 2874.5   | 20957.3 |
|                           | LB     | 6067.5  | 622.3  | 322.9   | 245.6  | 234.1   | 0.0    | 2038.2    | 1484.1   | 14263.4 |
|                           | UB     | 11783.6 | 887.6  | 1384.3  | 2322.0 | 972.4   | 5137.4 | 17645.5   | 10437.6  | 32121.5 |
| 08-04-22                  | Median | 1187.2  | 385.9  | 660.3   | 522.6  | 458.7   | 966.3  | 33042.3   | 35181.3  | 34936.8 |
|                           | LB     | 651.6   | 215.0  | 224.7   | 62.0   | 167.6   | 0.0    | 21005.3   | 9062.0   | 24148.0 |
|                           | UB     | 2841.9  | 621.8  | 1157.7  | 1316.6 | 767.2   | 3435.6 | 55553.7   | 149984.9 | 42706.4 |
| 08-11-22                  | Median | 2685.3  | 254.5  | 434.9   | 286.1  | 420.3   | 1237.7 | 6058.4    | 4442.5   | 22930.0 |
|                           | LB     | 1477.3  | 143.3  | 79.0    | 0.0    | 162.3   | 0.0    | 2242.7    | 2943.4   | 15153.2 |
|                           | UB     | 5348.1  | 385.7  | 848.3   | 924.7  | 696.3   | 3754.3 | 20689.6   | 6676.0   | 32717.9 |
| 08-18-22                  | Median | 1631.6  | 231.2  | 251.2   | 152.8  | 354.1   | 1158.6 | 6247.6    | 4667.2   | 18643.0 |
|                           | LB     | 711.3   | 120.6  | 32.6    | 0.0    | 114.4   | 0.0    | 1816.2    | 2955.4   | 12818.4 |
|                           | UB     | 3662.6  | 352.7  | 515.4   | 677.8  | 593.4   | 3503.7 | 15853.4   | 8601.9   | 25447.7 |
| 08-25-22                  | Median | 2312.1  | 185.7  | 147.6   | 609.1  | 277.7   | 806.8  | 3420.0    | 3871.9   | 15412.5 |
|                           | LB     | 1288.4  | 97.3   | 11.7    | 0.0    | 57.8    | 0.0    | 610.6     | 1938.8   | 9456.3  |
|                           | UB     | 3903.2  | 277.4  | 340.1   | 2517.0 | 506.4   | 2753.8 | 7594.1    | 6232.0   | 22458.5 |
| 09-01-22                  | Median | 1593.3  | 111.7  | 130.1   | 503.9  | 147.1   | 755.3  | 3824.4    | 3175.5   | 12899.5 |
|                           | LB     | 768.7   | 8.0    | 9.9     | 0.0    | 0.0     | 0.0    | 571.0     | 1698.0   | 7794.2  |
|                           | UB     | 2599.4  | 240.7  | 281.3   | 2252.0 | 410.0   | 2166.7 | 8101.4    | 4687.9   | 18540.1 |
| 09-08-22                  | Median | 1723.7  | 75.6   | 108.4   | 438.6  | 56.7    | 271.0  | 2978.7    | 2542.6   | 9097.0  |
|                           | LB     | 866.6   | 1.9    | 0.0     | 0.0    | 0.0     | 0.0    | 223.6     | 959.7    | 5279.6  |
|                           | UB     | 2648.9  | 180.9  | 267.2   | 1998.6 | 158.0   | 933.0  | 6706.9    | 4174.2   | 13323.9 |
| 09-15-22                  | Median | 2401.9  | 66.0   | 74.0    | 346.6  | 51.6    | 143.9  | 3826.9    | 2526.5   | 11764.0 |
|                           | LB     | 844.3   | 0.0    | 0.0     | 0.0    | 0.0     | 0.0    | 690.5     | 999.4    | 5704.9  |
|                           | UB     | 4116.9  | 415.6  | 733.7   | 1836.3 | 303.1   | 739.6  | 7379.2    | 4087.7   | 18545.3 |
| 09-22-22                  | Median | 2144.9  | 41.7   | 79.9    | 357.9  | 12.8    | 143.3  | 2958.6    | 2011.8   | 10205.4 |
|                           | LB     | 875.0   | 0.0    | 0.0     | 0.0    | 0.0     | 0.0    | 265.3     | 768.4    | 4305.2  |
|                           | UB     | 3452.4  | 354.2  | 734.6   | 1882.9 | 236.1   | 663.5  | 6078.7    | 3299.8   | 16332.0 |
| 09-29-22                  | Median | 1534.7  | 29.5   | 45.0    | 115.6  | 7.7     | 32.3   | 3365.1    | 1395.1   | 8853.4  |
|                           | LB     | 320.1   | 0.0    | 0.0     | 0.0    | 0.0     | 0.0    | 326.2     | 377.7    | 3312.8  |
|                           | UB     | 2898.0  | 223.8  | 701.1   | 1432.3 | 215.9   | 437.5  | 6758.5    | 2469.3   | 14514.1 |
| 10-06-22                  | Median | 1117.8  | 13.6   | 20.0    | 32.7   | 4.3     | 66.1   | 1017.4    | 931.4    | 5297.9  |
|                           | LB     | 129.8   | 0.0    | 0.0     | 0.0    | 0.0     | 0.0    | 0.0       | 330.9    | 244.2   |
|                           | UB     | 2240.8  | 129.0  | 574.3   | 1229.4 | 131.4   | 335.6  | 5154.0    | 1551.8   | 11508.3 |
| 10-13-22                  | Median | 878.9   | 14.2   | 2.7     | 10.3   | 1.5     | 43.0   | 1806.3    | 910.1    | 6231.5  |
|                           | LB     | 25.2    | 0.0    | 0.0     | 0.0    | 0.0     | 0.0    | 0.0       | 245.3    | 492.8   |
|                           | UB     | 1950.5  | 90.3   | 342.6   | 1087.6 | 125.6   | 315.5  | 5542.4    | 1603.3   | 12463.1 |

**Table 12s. Predicted cumulative number of newly forecasted monkeypox cases and 95% PIs for the weighted ensemble model.** Predicted cumulative number of newly forecasted monkeypox cases and 95% PIs for each 4-week ahead forecasts during the weeks of 7-28-2022 through 10-13-2022 based on a 10-week calibration period for the weighted sub-epidemic ensemble model.

| Unweighted - Ensemble Model |        |          |        |         |         |         |         |           |           |          |
|-----------------------------|--------|----------|--------|---------|---------|---------|---------|-----------|-----------|----------|
| Week                        |        | Brazil   | Canada | England | France  | Germany | Spain   | US (OWID) | US (CDC)  | World    |
| 07-28-22                    | Median | 9453.81  | 720.35 | 812.55  | 892.66  | 811.35  | 2501.29 | 3947.64   | 2787.79   | 20769.27 |
|                             | LB     | 6136.76  | 583.03 | 251.00  | 154.97  | 286.08  | 83.57   | 1722.17   | 1467.06   | 13597.43 |
|                             | UB     | 33425.20 | 866.54 | 1750.31 | 2298.95 | 2179.16 | 6289.50 | 14718.29  | 9995.46   | 31957.42 |
| 08-04-22                    | Median | 1255.12  | 387.40 | 675.83  | 668.80  | 484.80  | 1301.58 | 21959.92  | 37056.90  | 33481.53 |
|                             | LB     | 644.02   | 196.25 | 211.91  | 94.33   | 169.67  | 0.00    | 5763.36   | 9169.81   | 20344.07 |
|                             | UB     | 2154.17  | 655.15 | 1314.96 | 1430.76 | 782.50  | 5118.04 | 53110.37  | 151064.53 | 61582.74 |
| 08-11-22                    | Median | 3465.88  | 257.71 | 489.50  | 360.88  | 494.27  | 1556.86 | 7090.51   | 4526.81   | 21736.19 |
|                             | LB     | 1630.85  | 134.47 | 73.84   | 0.00    | 153.42  | 0.00    | 2045.94   | 3008.05   | 15234.04 |
|                             | UB     | 5086.97  | 390.58 | 1016.95 | 2905.87 | 1317.54 | 4640.71 | 23052.82  | 6832.69   | 31359.19 |
| 08-18-22                    | Median | 1691.65  | 278.17 | 302.44  | 200.16  | 388.30  | 1898.78 | 7120.39   | 4791.23   | 17854.07 |
|                             | LB     | 691.80   | 136.15 | 22.71   | 0.00    | 111.59  | 0.00    | 1552.00   | 2937.10   | 11341.66 |
|                             | UB     | 3661.71  | 459.49 | 1339.64 | 1033.44 | 758.20  | 4211.14 | 29838.26  | 29020.30  | 25529.89 |
| 08-25-22                    | Median | 2576.71  | 200.15 | 176.60  | 609.45  | 319.26  | 587.55  | 3807.32   | 3919.09   | 15401.01 |
|                             | LB     | 1150.41  | 85.09  | 13.61   | 0.00    | 77.69   | 0.00    | 453.12    | 1989.57   | 9839.95  |
|                             | UB     | 20773.99 | 808.69 | 451.66  | 4883.46 | 558.30  | 2537.73 | 9944.00   | 6237.37   | 22282.28 |
| 09-01-22                    | Median | 1602.62  | 125.83 | 141.45  | 432.51  | 173.88  | 481.38  | 4827.79   | 3399.82   | 15298.59 |
|                             | LB     | 706.05   | 2.07   | 1.95    | 0.00    | 0.00    | 0.00    | 428.49    | 1447.05   | 8529.28  |
|                             | UB     | 2828.54  | 331.73 | 410.76  | 2643.14 | 630.89  | 1931.92 | 84582.47  | 16358.72  | 23416.86 |
| 09-08-22                    | Median | 1966.47  | 89.40  | 138.00  | 406.53  | 70.80   | 307.24  | 3204.48   | 2692.46   | 9405.82  |
|                             | LB     | 832.92   | 0.00   | 0.00    | 0.00    | 0.00    | 0.00    | 46.76     | 670.41    | 4754.03  |
|                             | UB     | 14835.60 | 319.38 | 457.35  | 2483.85 | 277.94  | 1437.07 | 8769.74   | 9638.91   | 16766.10 |
| 09-15-22                    | Median | 3133.06  | 88.63  | 136.83  | 332.19  | 74.15   | 267.11  | 5045.99   | 2832.23   | 15653.78 |
|                             | LB     | 954.99   | 0.00   | 0.00    | 0.00    | 0.00    | 0.00    | 835.58    | 838.21    | 6437.87  |
|                             | UB     | 11140.29 | 645.42 | 1366.06 | 2374.49 | 571.20  | 2121.99 | 230054.20 | 7442.24   | 42965.67 |

**Table 13s. Predicted cumulative number of newly forecasted monkeypox cases and 95% PIs for the unweighted ensemble model.** Predicted cumulative number of newly forecasted monkeypox cases and 95% PIs for each of the 4-week ahead forecasts during the weeks of 7-28-2022 through 9-15-2022 based on a 10-week calibration period for the unweighted sub-epidemic ensemble model. Only weeks in which the 4-week ahead forecast have past are included in this table.
